# Supplementary material
Source: Research Square preprint supplement (doi:10.21203/rs.3.rs-9306226/v1)
Supplement: Supplementary file 1 [file 234fba87b6e64d42aba2f3b8.docx]

**Table 2.** Measurement Model: Reliability, Convergent Validity, and Discriminant Validity

| **Construct** | **Items** | **Factor Loadings (Range)** | **Cronbach’s α** | **CR** | **AVE** | **VIF** | **FT** | **PD** | **PSS** | **DHI** | **LS** |
| --- | --- | --- | --- | --- | --- | --- | --- | --- | --- | --- | --- |
| **Financial Toxicity (FT)** | 11 | 0.68–0.84 | 0.82 | 0.87 | 0.58 | <3 | 0.76 | — | — | — | — |
| **Psychological Distress (PD)** | 15 | 0.70–0.88 | 0.89 | 0.91 | 0.61 | <3 | 0.110* | 0.78 | — | — | — |
| **Social Support (PSS)** | 12 | 0.72–0.90 | 0.92 | 0.94 | 0.65 | <3 | -0.130* | -0.028 | 0.81 | — | — |
| **Digital Health Interventions (DHI)** | 5 | 0.69–0.83 | ≥0.70* | ≥0.80* | ≥0.50* | <3 | — | — | — | 0.75 | — |
| **Life Satisfaction (LS)** | 5 | 0.71–0.86 | 0.81 | 0.86 | 0.59 | <3 | -0.169** | -0.418** | 0.404** | — | 0.77 |

***Note:*** ** < 0.05, ** p < 0.01, *** p < 0.001*
